# Supplementary material for: Subclinical Inflammation and Diabetic Polyneuropathy
Source: Oxford University Press journal article supplement (doi:10.2337/dc08-2011), 2009-01-08
Supplement: dc08-2011_online_appendix.doc [file dc08-2011_online_appendix.doc]

**RESEARCH DESIGN AND METHODS**

Study population

The MONICA Augsburg project was part ofthe multinational WHO MONICA project (1-3) to estimatethe prevalence and distribution of cardiovascular disease risk factors in men and women. The MONICA/KORA S3 study population was recruited from the city of Augsburg and the adjacent counties Augsburg and Aichach-Friedberg. This study region in the south of Germany has a population of about 600,000 inhabitants of whom 430,000 are in the age range of 25 to 74 years. The study sample was drawn by two-cluster sampling. In the city of Augsburg, random samples of 311 individuals were drawn for each 10-year age and sex group in the age range of 25 to 74 years. In the counties Augsburg and Aichach-Friedberg, age and sex-stratified samples were drawn in 16 out of 68 communities as described (4). The total MONICA/KORA S3 samples consisted of 6640 individuals of whom 4856 (73.1%) participated in the survey. All study participants gave informed written consent and the study wasapproved by the ethics committee of the Bavarian Medical Association.

In2004–2005, all eligible participants from MONICA S3 were invited for a follow-up examination (F3) in the study center including clinical and laboratory measurements. In addition, persons who had been invited to participate in S3, but declined, were invited again to participate in F3. The total number of study participants was 3184 (48.0% of original total sample), 3006 of whom had already participated in S3 (61.9% of participants in S3). Subjects were classified as having diabetes if they self-reported a physician-based diagnosis of diabetes that could be validated by contacting the treating physicians or by medical chart review or if they were currently taking oral antidiabetic medication.

A medical examination to assess the prevalence of DPN was planned for all participants in F3 with self-reported diabetes. 252 persons reported that they had diabetes and 244 (96.8%) agreed to the neuropathy examination. Six persons refused to take part in the examination and two were excluded for medical reasons. In addition, 4 participants were included in the neuropathy examination module who did not report to have diabetes, but had physician-diagnosed diabetes. For 214 individuals, a diagnosis of type 2 diabetes could be validated. In addition, 13 participants took oral antidiabetic drugs and were also treated as patients with type 2 diabetes here so that the total number of patients with type 2 diabetes was 227 in the present study. The remaining 21 participants consisted of 5 persons without validated diabetes, 5 persons for whom a validation of diabetes status was not possible, 9 persons with type 1 diabetes and 2 persons with other types of diabetes (Figure A1, Online-only appendix).

### Data collection

Baseline information on sociodemographic variables, physicalactivity level, medication use, parental history of diabetesand alcohol consumption was gathered by trained medical staffduring a standardized interview. In addition, all participantsunderwent an extensive standardized medical examination thatincluded the collection of a nonfasting venous blood sample while subjects were sitting. All measurementprocedures were described elsewhere in detail (1,5,6).

Briefly, anthropometricmeasurements were taken after the participants had removed theirshoes, heavy clothing and belts. Body weight was measured tothe nearest 0.1 kg and height to the nearest 0.5 cm. Waist circumference was measured at thelevel midway between the lower rib margin and the iliac crestwhile the participants breathed out. Blood pressure was measured three times at the right arm in a sitting position after a fifteen-minute rest using a validated automatic device (OMRON HEM 705-CP). The mean of the second and third measurement was used for the analysis.

High alcohol consumption was defined as daily intake 40 g for men and 20 g for women. Participants were classified as "physically active" if they regularly participated in sports during leisuretime in summerand winter and if they were active in summer and in winter with a duration of ≥1 hour/week in either season. Participants were considered to have had a myocardial infarction if they reported treatment for myocardial infarction as in-patient in a hospital. Recent respiratory infections were defined as infections during the last 7 days before study participation. Study participants were asked for current medication such as lipid-lowering medication, antidiabetic medication, antihypertensive medication and non-steroidal antiinflammatory drugs (NSAIDs). NSAIDs are defined in this study as drugs with systemic action that contain salicylates, arylalkanoic acids, 2-arylpropionic acids (profens), N-arylanthranilic acids, oxicams or pyrazolidine derivatives (e.g. aspirin, indometacin, diclofenac, ibuprofen).

**Neuropathy screening**

We used the Michigan Neuropathy Screening Instrument (MNSI) (7) to identify patients with DPN. The physical examination includes the assessment of ankle reflexes, vibration perception, pain perception and temperature perception.

Briefly, ankle reflexes are examined using an appropriate reflex hammer. The ankle reflexes are elicited in the sitting position. The Achilles tendon is percussed directly and the reflex is graded as present, present after reinforcement or absent.

Vibration perception is measured with a held-held tuning fork at the great toes (three times on each side). The test is based on the time period for which the patient can sense the vibration from the vibrating tuning fork. The result of each test is scored as vibration perception present (5/8 to 8/8; i.e., vibration can be sensed relatively long), decreased (0.5/8 to 4.5/8; i.e., period of sensation shorter than normal) or absent (0/8; no vibration perception at all), and all six tests are summarized into one item for each foot (vibration perception present, decreased or absent).

Pain perception is assessed with a pinprick test at the dorsal side of each foot three times. This is to be perceived as painful (in contrast to just sensed), and the result is scored as normal, impaired or absent pain perception on each foot.

Temperature perception is measured using a TipTherm device. The base of the TipTherm consists of plastic that is perceived as relatively warm at room temperature, whereas the top is made of metal that is usually perceived as cold. The dorsal sides of both feet are touched with both sides of the TipTherm (three times on each foot). If the patient cannot distinguish reliably between both sensations, his/her temperature perception is scored as impaired/absent, and if the patient can identify the warm and cold side of the TipTherm (without looking), it is scored as present.

The physical assessment of the MNSI contains items on the appearance of feet (normal or deformities, dry skin, callus, infection, fissure or other irregularities), foot ulceration, ankle reflexes and vibration perception at the great toes. The minimum score is 0 points (everything normal), the maximum score is 8 points. We used both the continuous MNSI score in the analysis as well as a cut-off of >2 points as previously suggested (7-10) to identify patients at high risk of DPN.

In order to better understand the mechanistic links between subclinical inflammation and DPN, associations between immunological variables and individual components of DPN were analyzed.

Three new continuous scores were calculated so that the full information from the neurological examination could be used:

(1) ankle reflex score (sum of assessment of presence/absence of ankle reflex for both feet; between 0 [present on both sides] and 4 [absent on both sides]),

(2) vibration perception score (sum of 3 measurements with tuning fork on each toe; between 0 [absent] and 48 [present]),

(3) temperature perception score (sum of 3 measurements on each foot; between 0 [absent] and 6 [present]).

In addition to these three continuous scores, three categorical variables were also assessed for their potential association with subclinical inflammation:

(1) appearance of feet (results of physical assessment for both feet; not normal as defined by deformities, dry skin/callus, infection, fissure or other of at least one foot),

(2) pain perception (pin-prick; normal means pain perception present on both feet; not normal means reduced or absent pain perception on at least one foot),

1. pain or discomfort in the lower limbs (not normal defined by "any pain or discomfort in feet or legs when not walking [burning, numbness, tingling, fatigue, cramping, aching]")

The variable “pain or discomfort in the lower limbs” combines two items from the neuropathy symptom score (NSS), i.e., “pain or discomfort in legs (burning, numbness, tingling)” and “pain or discomfort in legs (fatigue, cramping, aching)” (11).

**Measurement of metabolic variables**

Cholesterol, A1c and uric acid were measured using standard assays in the Institute of Laboratory Medicine at Klinikum Augsburg. Total serum cholesterolanalyses were carried out with an autoanalyzer by using an enzymaticmethod (CHOD-PAP; CHOL Flex, Dade Behring, Marburg, Germany). High-density lipoproteincholesterol (HDL) and low density lipoprotein cholesterol (LDL) were also measured directly (AHDL Flex and ALDL Flex, Dade Behring). A1c was measured by an immunoturbidimetric method (TINIA, Dade Behring) and serum uric acid was determined with an enzymatic colorimetric reaction (URCA Flex, Dade Behring).

Measurement of immune mediators

Immunological variables were measured from serum samples that were stored in liquid nitrogen between the survey and measurement. Serum concentrations of C-reactive protein (CRP) and serum amyloid A (SAA) were assessed by a high-sensitivity latex-enhanced nephelometric assay (CRP) and by immunonephelometry (SAA) on a BN II analyzer (Dade Behring) (12). Interleukin (IL)-6, TNF and adiponectin were measured using Quantikine HS (IL-6, TNF) and Quantikine (adiponectin) ELISAs from R&D Systems (Wiesbaden, Germany). Serum levels of IL-18, IL-8, MCP-1 and interferon--inducible protein (IP)-10 were quantified using a bead-based multiplex assay on a Luminex 100 analyzer (Luminex Corporation, Austin, TX) as described (13,14). Fluorescent xMAP COOH microspheres were purchased from Luminex Corporation. Recombinant proteins were obtained from MBL (Nagoya, Japan; IL-18), R&D Systems (MCP-1), the National Institute for Biological Standards and Controls (Potters Bar, UK; IL-8) and BD Biosciences (Heidelberg, Germany; IP-10). Antibody pairs were purchased from MBL (IL-18), R&D Systems (MCP-1, IL-8) and BD Biosciences (IP-10). Inter-assay coefficients of variation for CRP, SAA, IL-6, IL-18, TNF, adiponectin, IL-8, MCP-1 and IP-10 were 4.3%, 5.0%, 15.5%, 8.5%, 8.8%, 13.6%, 17.8%, 5.8% and 22.7%,respectively. Limits of detection for CRP, SAA, IL-6, IL-18, TNF, adiponectin, IL-8, MCP-1 and IP-10 were 0.16 mg/l, 0.7 mg/l, 0.08 pg/ml, 9.8 pg/ml, 0.25 pg/ml, 1.9 pg/ml, 0.62 pg/ml, 4.9 pg/ml and 9.8 pg/ml, respectively

### Statistical analysis

**Data are given as proportions (%) for categorical variables, as mean  standard deviation (SD) for continuous variables with Gaussian distribution and as median (25th percentile; 75th percentile) for continuous variables with non-Gaussian distribution.** Categorical variables with 2 or >2 classes were compared using Fisher's exact test and chi-square test, respectively. Continuous variables with Gaussian distribution were compared using Student's t-test. Wilcoxon test and Kruskal-Wallis test were used to compare continuous variables without Gaussian distribution. The MNSI score was considered as approximately continuous variable. In case of non-normality, variables were log-transformed (log: natural logarithm) for regression analyses in order to approximate a normal distribution. Associations between serum concentrations of immunological variables and measures of neuropathy (dichotomous diagnosis of DPN or continuous MNSI) were analyzed using multiple linear regression models with concentrations of immune markers (log-transformed in case of non-normality) as dependent and potentially confounding variables as independent variables. Multivariable analyses were adjusted for the continuous variables age, waist circumference, diabetes duration, A1c and total cholesterol as well as for the categorical variables sex, hypertension (defined as blood pressure >140/90 mmHg or antihypertensive medication given that the subjects were aware of being hypertensive; yes/no), smoking status (current smoking yes/no), alcohol consumption (high alcohol intake defined as ≥40 g/d for men, ≥20 g/d for women), physical activity (inactive vs. active, i.e. regular physical activity in summer and in winter with a duration of ≥1 hour/week in either season), lipid-lowering medication (yes/no), current use of NSAIDs (yes/no) and respiratory infections during the last 7 days (yes/no). For all statistical analyses a *P* value less than 0.05 was considered to be statistically significant. **Analyses were conducted using SAS (Version 9.1, SAS Institute, Cary, NC).**

References

1. Hense HW, Filipiak B, Döring A, Stieber J, Liese A, Keil U: Ten-year trends of cardiovascular risk factors in the MONICA Augsburg Region in Southern Germany. Results from the 1984/85, 1989/90 and 1994/95 surveys. *CVD Prevention* 1:318-327, 1998

2. Hense HW, Gneiting B, Muscholl M, Broeckel U, Kuch B, Doering A, Riegger GA, Schunkert H: The associations of body size and body composition with left ventricular mass: impacts for indexation in adults. *J Am Coll Cardiol* 32:451-457, 1998

3. Keil U: Das weltweite WHO-MONICA-Projekt. Ergebnisse und Ausblick. *Gesundheitswesen* 67:S38-S45, 2005

4. Löwel H, Döring A, Schneider A, Heier M, Thorand B, Meisinger C; MONICA/KORA Study Group: The MONICA Augsburg surveys – basis for prospective cohort studies. *Gesundheitswesen* 67:S13-S18, 2005

5. Meisinger C, Thorand B, Schneider A, Stieber J, Döring A, Lowel H. Sex differences in risk factors for incident type 2 diabetes mellitus: the MONICA Augsburg cohort study. *Arch Intern Med* 162:82-89, 2002

6. Schaeffler V, Doring A, Winkler G, Keil U: Trends in food consumption in a south German population from 1984/85 to 1989/90: results from the WHO MONICA project Augsburg. *Ann Nutr Metab* 40:129-136, 1996

# 7. Feldman EL, Stevens MJ, Thomas PK, Brown MB, Canal N, Greene DA: A practical two-step quantitative clinical and electrophysiological assessment for the diagnosis and staging of diabetic neuropathy. *Diabetes Care* 17:1281-1289, 1994

# 8. Lunetta M, Le Moli R, Grasso G, Sangiorgio L: A simplified diagnostic test for ambulatory screening of peripheral diabetic neuropathy. *Diabetes Res Clin Pract* 39:165-172, 1998

9. Jia WP, Shen Q, Bao YQ, Lu JX, Li M, Xiang KS : Evaluation of the four simple methods in the diagnosis of diabetic peripheral neuropathy. *Zhonghua Yi Xue Za Zhi* 86:2707-2710, 2006 [Article in Chinese, English abstract available]

10. Moghtaderi A, Bakhshipour A, Rashidi H: Validation of Michigan neuropathy screening instrument for diabetic peripheral neuropathy. *Clin Neurol Neurosurg* 108:477-481, 2006

11. Young MJ, Boulton AJM, Macleod AF, Williams DRR, Sonksen PH: A multicentre study of the prevalence of diabetic peripheral neuropathy in the United Kingdom hospital clinic population*. Diabetologia* 36:150-154, 1993

12. Herder C, Peltonen M, Koenig W, Kräft I, Müller-Scholze S, Martin S, Lakka T, Ilanne-Parikka P, Eriksson JG, Hämäläinen H, Keinänen-Kiukaanniemi S, Valle TT, Uusitupa M, Lindström J, Kolb H, Tuomilehto J; Finnish Diabetes Prevention Study Group:Systemic immune mediators and lifestyle changes in the prevention of type 2 diabetes: results from the Finnish Diabetes Prevention Study. *Diabetes* 55:2340-2346, 2006

13. Herder C, Baumert J, Thorand B, Koenig W, de Jager W, Meisinger C, Illig T, Martin S, Kolb H: Chemokines as risk factors for type 2 diabetes: results from the MONICA/KORA Augsburg Study, 1984-2002. *Diabetologia* 49:921-929, 2006

14. Herder C, Schneitler S, Rathmann W, Haaastert B, Schneitler H, Winkler H, Bredahl R, Hahnloser E, Martin S: Low-grade inflammation, obesity, and insulin resistance in adolescents. *J Clin Endocrinol Metab* 92:4569-4574, 2007

**Figure A1 --- Study participants (subsample of the MONICA/KORA survey F3 (2004/2005)**

**
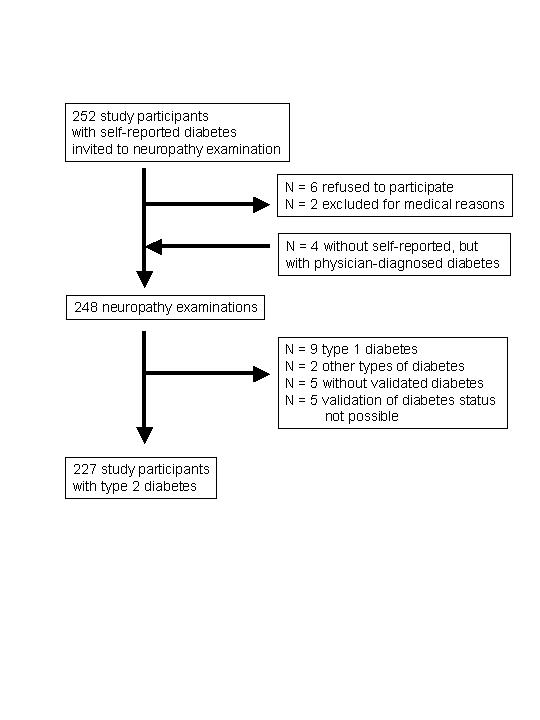
**

**Table A1 --- Baseline characteristics of the study participants with type 2 diabetes by DPN status**

| **Variable** | **DPN (MNSI > 2)** | No DPN (MNSI  2) | ***P*** |
| --- | --- | --- | --- |
| N | 111 | 116 | --- |
| Male (%) | 55.0 | 57.8 | 0.69 |
| Age (years) | **68.9  8.4** | **65.6  9.7** | **0.0064** |
| BMI (kg/m2) | **32.2  5.0** | **30.7  4.5** | **0.018** |
| Waist circumference (cm) | **108  13** | **104  12** | **0.0060** |
| A1c (%) | 6.43  0.99 | 6.31  1.00 | 0.35 |
| Diabetes duration (years) | 9.96  9.27 | 9.21  9.61 | 0.56 |
| Total cholesterol (mmol/l) | 5.14  1.11 | 5.29  1.02 | 0.28 |
| LDL cholesterol (mmol/l) | 2.98  0.80 | 3.03  0.76 | 0.64 |
| HDL cholesterol (mmol/l) | 1.25  0.38 | 1.27  0.41 | 0.62 |
| Systolic blood pressure (mmHg) | 138  20 | 139  20 | 0.67 |
| Diastolic blood pressure (mmHg) | 80  12 | 81  11 | 0.61 |
| Hypertension (%)* | 85.5 | 85.3 | 1.00 |
| Uric acid (mg/dl) | 5.97  1.55 | 5.76  1.47 | 0.33 |
| Current smokers (%) | 10.9 | 10.3 | 1.00 |
| High alcohol intake (%) | 12.6 | 15.5 | 0.57 |
| Physically inactive (%) | 67.6 | 60.3 | 0.27 |
| Antihypertensive medication (%) | 79.3 | 70.7 | 0.17 |
| Lipid-lowering medication (%) | 36.0 | 28.5 | 0.26 |
| NSAIDs (%) | **54.1** | **37.1** | **0.012** |
| Antidiabetic medication (%) | 83.8 | 79.3 | 0.40 |
| Recent respiratory infection (%) | 18.9 | 13.9 | 0.37 |
| ***Immunological variables*** | | | |
| Leukocyte count (/nl) | 7.20 (5.80; 8.80) | 7.30 (6.15; 8.40) | 0.92 |
| CRP (mg/l) | **3.36 (1.35; 5.75)** | **2.07 (0.85; 4.29)** | **0.013** |
| SAA (mg/l) | 5.00 (3.40; 8.80) | 4.80 (3.20; 7.40) | 0.41 |
| IL-6 (pg/ml) | **3.08 (1.91; 4.23)** | **2.30 (1.43; 3.79)** | **0.0091** |
| IL-18 (pg/ml) | 151 (111; 179) | 160 (119; 190) | 0.31 |
| TNF (pg/ml) | 1.93 (1.60; 2.34) | 1.72 (1.45; 2.23) | 0.10 |
| Adiponectin (ng/ml) | 6326 (4111; 9152) | 6729 (4191; 10837) | 0.38 |
| IL-8 (pg/ml) | 8.25 (5.83; 9.98) | 7.85 (5.66; 11.16) | 0.96 |
| MCP-1 (pg/ml) | 204 (153; 257) | 205 (159; 267) | 0.75 |
| IP-10 (pg/ml) | **234 (171; 301)** | **199 (153; 272)** | **0.039** |

Data are given as mean  SD, median (25th percentile; 75th percentile) or proportions (%). *Hypertension was defined as blood pressure >140/90 mmHg or use of antihypertensive medication given that the subjects were aware of being hypertensive. NSAIDs, non-steroidal anti-inflammatory drugs.

Table A2 --- Univariate correlation between immune mediators

| Variable | WBC | CRP | SAA | IL-6 | IL-18 | TNF | Adipo-nectin | IL-8 | MCP-1 | IP-10 |
| --- | --- | --- | --- | --- | --- | --- | --- | --- | --- | --- |
| WBC | 1 | **0.16*** | **0.15*** | 0.10 | **0.20**** | **0.21**** | 0.04 | **-0.15*** | -0.04 | 0.03 |
| CRP |  | 1 | **0.63***** | **0.56***** | **0.15*** | **0.30***** | **-0.14*** | 0.001 | -0.08 | **0.17*** |
| SAA |  |  | 1 | **0.41**** | 0.09 | **0.26***** | 0.10 | -0.002 | -0.11 | 0.10 |
| IL-6 |  |  |  | 1 | 0.04 | **0.42***** | 0.03 | -0.002 | 0.01 | **0.28***** |
| IL-18 |  |  |  |  | 1 | 0.18** | -0.05 | **0.19**** | -0.04 | **0.27***** |
| TNF |  |  |  |  |  | 1 | -0.008 | 0.03 | -0.007 | **0.34***** |
| Adiponectin |  |  |  |  |  |  | 1 | -0.06 | -0.07 | **0.19**** |
| IL-8 |  |  |  |  |  |  |  | 1 | **0.24***** | 0.09 |
| MCP-1 |  |  |  |  |  |  |  |  | 1 | 0.01 |
| IP-10 |  |  |  |  |  |  |  |  |  | 1 |

Correlations are assessed by Pearson correlation coefficients *r*. Concentrations of circulating immune mediators were ln-transformed. **P*<0.05; ***P*<0.01; ****P*<0.001
